# Supplementary material for: Scaffold-free generation of heterotypic cell spheroids using acoustofluidics
Source: Royal Society of Chemistry journal article supplement (doi:10.1039/d1lc00496d), 2021-01-01
Supplement: d1lc00496d2.pdf [file d1lc00496d2.pdf]

## Supporting Information

### **Scaffold-free Generation of Heterotypic Cell Spheroids Using Acoustofluidics**

Zhuhao Wu,<sup>1,4</sup> Bin Chen,<sup>2,4</sup> Yue Wu,<sup>1,4</sup> Yu Xia,<sup>1</sup> Hui Chen,<sup>1</sup> Zhiyi Gong,<sup>1</sup> Hang hu,<sup>3</sup> Zhao Ding,<sup>3\*</sup>  
and Shishang Guo<sup>1\*</sup>

1. Key Laboratory of Artificial Micro- and Nano-structures of Ministry of Education, School of Physics and Technology, Wuhan University, Wuhan 430072, People's Republic of China.

2. Department of Laboratory Medicine, Guangzhou First People's Hospital, School of Medicine, South China University of Technology, Guangzhou 510180, People's Republic of China.

3. Department of Colorectal and Anal Surgery, Zhongnan Hospital of Wuhan University, Wuhan, Hubei 430072, People's Republic of China.

4. These authors contributed equally to this work.

\*Corresponding email: gssyhx@whu.edu.cn or wb002550@whu.edu.cn

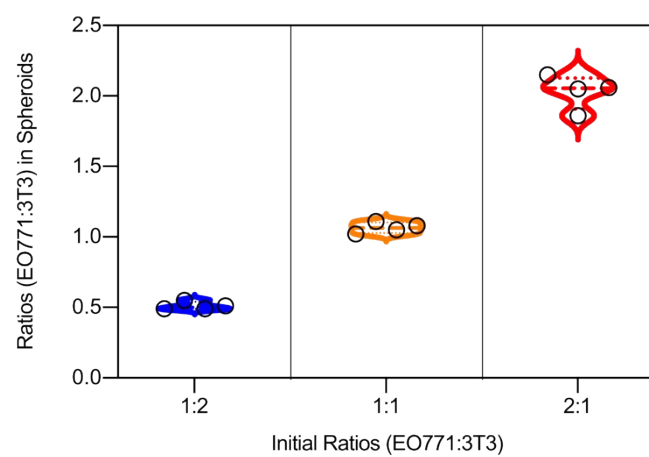

**Figure S1.** The quantitative statistics of ratios (EO771:3T3) in heterotypic spheroids.
